# Supplementary material
Source: Springer Nature journal article supplement (https://www.springermedizin.de/resource/supplementary/13601_2013_646_MOESM4_ESM.pdf/9677908)

# Patients with non-specific respiratory symptoms, who cannot be diagnosed with traditional tools

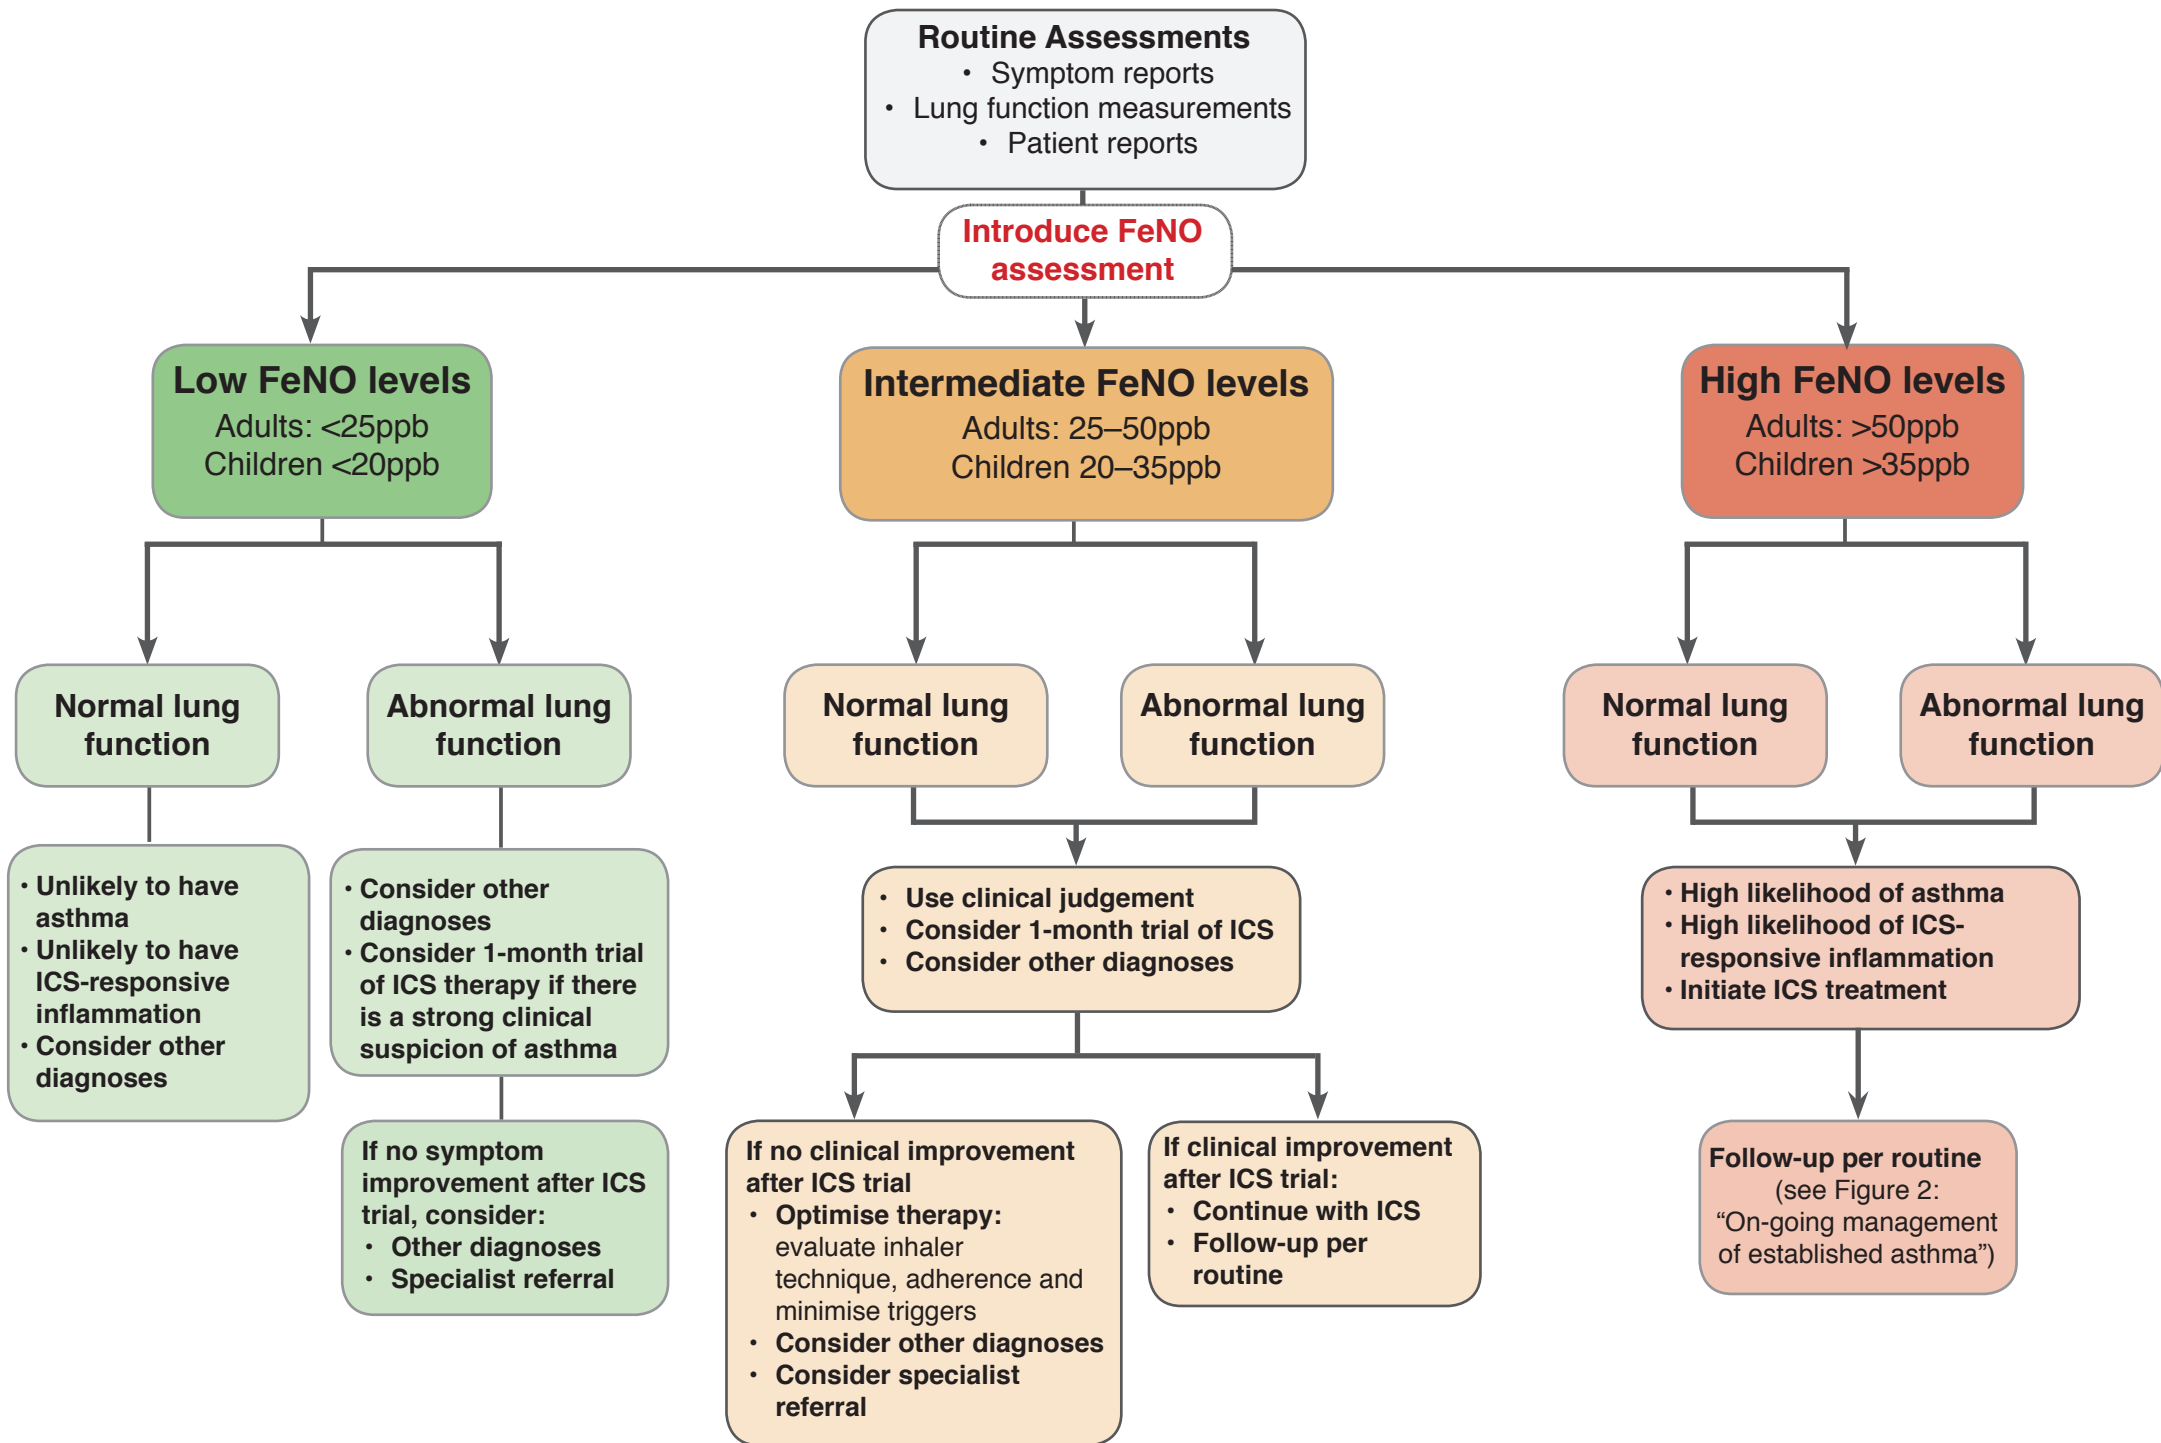

Supplement: MOESM4 [file 9677908]
